# Supplementary material
Source: MDPI journal article supplement (https://www.mdpi.com/2036-7449/15/1/1)
Supplement: s1 [file s1]

**Table S1. Search strategy.**

| Database | Table S1-Search strategy                                                                                                                                                                                                                                                                                                                                                                                                                                                                                                                                                                                                                                                                                                                                                                                                                                                                                                                                                                      | Result | Filters applied:         |
|----------|-----------------------------------------------------------------------------------------------------------------------------------------------------------------------------------------------------------------------------------------------------------------------------------------------------------------------------------------------------------------------------------------------------------------------------------------------------------------------------------------------------------------------------------------------------------------------------------------------------------------------------------------------------------------------------------------------------------------------------------------------------------------------------------------------------------------------------------------------------------------------------------------------------------------------------------------------------------------------------------------------|--------|--------------------------|
| PubMed   | (coverage[Title/Abstract] OR equity[Title/Abstract] OR disparity[Title/Abstract] OR inequity[Title/Abstract] OR equality[Title/Abstract] OR inequality[Title/Abstract] OR expenditure [Title/Abstract] OR cost [Title/Abstract]) AND (("hiv treatment" [Title/Abstract] OR "human immunodeficiency virus treatment"[Title/Abstract] OR "AIDS treatment" [Title/Abstract] OR "acquired immunodeficiency syndrome treatment"[Title/Abstract] OR "hiv/aids treatment" [Title/Abstract] OR "human immunodeficiency virus /acquired immunodeficiency syndrome treatment"[Title/Abstract] OR ART[Title/Abstract] OR "antiretroviral therapy"[Title/Abstract] OR "antiretroviral treatment"[Title/Abstract])) NOT (Address OR Autobiography OR Bibliography OR Clinical conference OR Clinical Trail Protocol OR Clinical Trial, Veterinary OR Comment OR Editorial OR Duplicate Publication OR Guideline OR Interactive Tutorial OR Retracted Publication OR Published Erratum OR Letter OR Lecture | 5182   | From 2015/1/1 - 2022/3/3 |

|                |                                                                                                                                                                                                                                                                                                                                                                                                                                                                                                                                                                                                                                                                                                                                                          |     |                          |
|----------------|----------------------------------------------------------------------------------------------------------------------------------------------------------------------------------------------------------------------------------------------------------------------------------------------------------------------------------------------------------------------------------------------------------------------------------------------------------------------------------------------------------------------------------------------------------------------------------------------------------------------------------------------------------------------------------------------------------------------------------------------------------|-----|--------------------------|
|                | OR News) Filters applied: from 2015/1/1 - 2022/3/3                                                                                                                                                                                                                                                                                                                                                                                                                                                                                                                                                                                                                                                                                                       |     |                          |
| Web of Science | (((TI=(coverage OR equity OR disparity OR inequity OR equality OR inequality OR quality OR expenditure OR cost))) AND ((TI=("HIV treatment" OR "human immunodeficiency virus treatment " OR "AIDS treatment" OR "acquired immunodeficiency syndrome treatment " OR "HIV/aids treatment" OR "human immunodeficiency virus /acquired immunodeficiency syndrome treatment " OR ART OR "antiretroviral therapy" OR "antiretroviral treatment")))) AND (PY==( "2021" OR "2020" OR "2019" OR "2018" OR "2016" OR "2015" OR "2017")))) NOT Document Types: Letters or Meeting Abstracts or Editorial Materials or Corrections or Book chapters or Books or Book reviews or Biographical-Items or News Items or Proceedings Papers or Retractions or Data Papers | 523 | From 2015/1/1 - 2022/3/3 |

**Table S2: Characteristics of articles**

| Author           | Publication year | Country  | WHO region | World Bank economy | Study approach | Specific term | Major category |
|------------------|------------------|----------|------------|--------------------|----------------|---------------|----------------|
| Bachanas P et al | 2021             | Botswana | Africa     | LM                 | Quantitative   | coverage      | Coverage       |

|                         |      |                                  |                  |              |                                            |                                                                       |                      |
|-------------------------|------|----------------------------------|------------------|--------------|--------------------------------------------|-----------------------------------------------------------------------|----------------------|
| Kebaabetsw P et al      | 2020 | Botswana                         | Africa           | Upper middle | Quantitative                               | Barriers to access                                                    | Coverage             |
| Mathews C et al         | 2021 | South Africa                     | Africa           | Upper middle | Quantitative                               | ART coverage                                                          | Coverage             |
| Mnyaka OR et al         | 2021 | South Africa                     | Africa           | Upper middle | Quantitative                               | Barriers to treat                                                     | Coverage             |
| Plazy M et al           | 2016 | South Africa                     | Africa           | Upper middle | Quantitative                               | ART coverage                                                          | Coverage             |
| Puttkammer N et al      | 2020 | Haiti                            | Americas         | LM           | Quantitative                               | ART coverage                                                          | Coverage             |
| Levira F et al          | 2015 | Tanzania                         | Africa           | LM           | Quantitative                               | coverage                                                              | Coverage             |
| Castillo-Cañón JC et al | 2021 | Colombia                         | Americas         | Upper middle | Quantitative                               | Healthcare-related expenditures                                       | Financial protection |
| Etiaba E et al          | 2016 | Nigeria                          | Africa           | LM           | Quantitative                               | catastrophic health expenditure                                       | Financial protection |
| Barenes H et al         | 2015 | Lao People's Democratic Republic | Western Pacific  | LM           | Quantitative                               | OOP & CHE                                                             | Financial protection |
| Aliyu A et al           | 2019 | Nigeria                          | Africa           | LM           | Quantitative                               | Quality                                                               | Quality              |
| Alvi Y et al            | 2020 | India                            | South-East Asia  | LM           | Quantitative                               | OOP & CHE                                                             | Financial protection |
| Assefa Y et al          | 2020 | Across countries                 | Across countries | Across       | Mixed method (Literature & USAID/WHO data) | ART coverage & its inequity                                           | inequity             |
| Cunama L et al          | 2018 | Swaziland                        | Africa           | LM           | Quantitative                               | Cost effectiveness                                                    | Financial protection |
| de Freitas MA et al     | 2016 | Brazil                           | Americas         | Upper middle | Quantitative                               | ART coverage                                                          | Coverage             |
| Dickerson S et al       | 2020 | Malawi                           | Africa           | low          | Quantitative                               | medical spending, capacity to pay and catastrophic health expenditure | Financial protection |

|                     |      |              |                 |              |              |                    |                      |
|---------------------|------|--------------|-----------------|--------------|--------------|--------------------|----------------------|
| Exavery A et al     | 2020 | Tanzania     | Africa          | LM           | Quantitative | expenditures       | Coverage             |
| Genberg BL et al    | 2019 | Kenya        | Africa          | LM           | Quantitative | ART coverage       | Coverage             |
| McCreesh N et al    | 2017 | Uganda       | Africa          | low          | Quantitative | Cost effectiveness | Financial protection |
| Miyano S et al      | 2017 | Zambia       | Africa          | LM           | Quantitative | Cost effectiveness | Financial protection |
| Nosyk B et al       | 2015 | Canada       | Americas        | High         | Quantitative | cost effectiveness | Financial protection |
| Taverne B et al     | 2021 | Senegal      | Africa          | LM           | Quantitative | OOP & CHE          | Financial protection |
| Teeraananchai et al | 2020 | Thailand     | South-East Asia | Upper middle | Quantitative | ART coverage       | Coverage             |
| Vu L et al          | 2016 | Uganda       | Africa          | low          | Quantitative | cost               | Financial protection |
| Vu LTH et al        | 2021 | Vietnam      | Western Pacific | LM           | Quantitative | OOP & CHE          | Financial protection |
| Were LPO et al      | 2020 | Kenya        | Africa          | LM           | Quantitative | Insurance          | Financial protection |
| McClarty LM et al   | 2021 | Canada       | Americas        | High         | Quantitative | sociodemographic   | Inequity             |
| Yakob BC            | 2015 | Ethiopia     | Africa          | low          | Quantitative | Quality            | Quality              |
| Visser CA           | 2018 | South Africa | Africa          | Upper middle | Mixed method | Quality            | Quality              |
| Stecher C et al     | 2021 | USA          | Americas        | High         | Quantitative | Quality            | Quality              |
| Seeberger CA        | 2019 | Uganda       | Africa          | low          | Quantitative | Quality            | Quality              |
| Rice WS et al       | 2020 | USA          | Americas        | High         | Qualitative  | Quality            | Quality              |
| Rewari BB et al     | 2017 | India        | South-East Asia | LM           | Quantitative | Quality            | Quality              |

|                       |      |                    |                  |              |              |                    |                      |
|-----------------------|------|--------------------|------------------|--------------|--------------|--------------------|----------------------|
| Rawat A et al         | 2018 | South Africa       | Africa           | Upper middle | Quantitative | Quality            | Quality              |
| Rabkin M et al        | 2017 | Kenya              | Africa           | LM           | Quantitative | Quality            | Quality              |
| Pilgrim N et al       | 2018 | Zambia             | Africa           | LM           | Qualitative  | Quality            | Quality              |
| Orlando S et al       | 2016 | Malawi             | Africa           | low          | Quantitative | Cost effectiveness | Financial protection |
| Olivieri-Mui B et al  | 2021 | USA                | Americas         | High         | Quantitative | Quality            | Quality              |
| Nduaguba SO et al     | 2020 | USA                | Americas         | High         | Quantitative | Cost               | Financial protection |
| MacKenzie LJ et al    | 2017 | Canada             | Americas         | High         | Quantitative | Quality            | Quality              |
| Luna-Mireles et al    | 2019 | Mexico             | Americas         | Upper middle | Quantitative | Quality            | Quality              |
| Li C et al            | 2020 | China              | Western Pacific  | Upper middle | Qualitative  | Quality            | Quality              |
| Landovitz RJ et al    | 2016 | USA                | Americas         | High         | Quantitative | Quality            | Quality              |
| Kesselring S et al    | 2016 | Canada             | Americas         | High         | Quantitative | Quality            | Quality              |
| Karver TS et al       | 2022 | Dominance Republic | Across countries | Across       | Mixed        | Quality            | Quality              |
| Ghate M et al         | 2015 | India              | South-East Asia  | LM           | Quantitative | Quality            | Quality              |
| do Nascimento L et al | 2016 | Brazil             | Americas         | Upper middle | Quantitative | Quality            | Quality              |
| Cholong BJ et al      | 2022 | Cameroon           | Africa           | LM           | Quantitative | CHE                | Financial protection |
| Chaumont C et al      | 2019 | Dominance Republic | Across countries | Across       | Quantitative | OOP expenditure    | Financial protection |
| Bousmah M et al       | 2021 | Cameroon           | Africa           | LM           | Quantitative | CHE                | Financial protection |
| Assebe LF et al       | 2020 | Ethiopia           | Africa           | low          | Quantitative | CHE                | Financial protection |

|                    |      |                      |                  |              |              |                           |                      |
|--------------------|------|----------------------|------------------|--------------|--------------|---------------------------|----------------------|
| Nelson RE et al    | 2018 | USA                  | Americas         | High         | Quantitative | Healthcare expenditures   | Financial protection |
| Negin J et al      | 2017 | South Africa         | Africa           | Upper middle | Quantitative | CHE                       | Financial protection |
| Ndukwe CD et al    | 2018 | Nigeria              | Africa           | LM           | Quantitative | OOP expenditure           | Financial protection |
| Long LC et al      | 2016 | South Africa         | Africa           | Upper middle | Quantitative | Cost of ART               | Financial protection |
| Lee E et al        | 2021 | Australia            | Western Pacific  | High         | Quantitative | OOP expenditure           | Financial protection |
| Forsythe SS et al  | 2019 | Across countries     | Across countries | Across       | Quantitative | Cost of ART               | Financial protection |
| Stelmach RD et al  | 2021 | Co^ted'Ivoire        | Africa           | LM           | Quantitative | OOP expenditure           | Financial protection |
| Shukla M et al     | 2015 | India                | South-East Asia  | LM           | Quantitative | CHE                       | Financial protection |
| Setiawan E et al   | 2022 | Indonesia            | South-East Asia  | LM           | Quantitative | Coverage & Cost for ART   | Coverage             |
| Onwujekwe OE et al | 2016 | Nigeria              | Africa           | LM           | Quantitative | Healthcare expenditures   | Financial protection |
| Tran BX et al      | 2016 | Vietnam              | Western Pacific  | LM           | Quantitative | Socioeconomic disparity   | Inequity             |
| Moyo S et al       | 2018 | Kenya & South Africa | Africa           | Across       | Quantitative | Socio-demographic         | Inequity             |
| Laut KG et al      | 2018 | Across countries     | European         | Across       | Quantitative | three HIV key populations | Inequity             |
| Girum T et al      | 2018 | Ethiopia             | Africa           | low          | Quantitative | Gender                    | Inequity             |
| Auld AF et al      | 2015 | Across countries     | Across countries | Across       | Quantitative | Gender                    | Inequity             |

|                      |      |                       |                       |              |                                            |                                  |           |
|----------------------|------|-----------------------|-----------------------|--------------|--------------------------------------------|----------------------------------|-----------|
| Adeyinka DA et al    | 2017 | Sub-Saharan Africa    | Africa                | Across       | Quantitative                               | ART Coverage                     | Coverage  |
| Chan BT et al        | 2015 | Sub-Saharan Africa    | Africa                | Across       | Quantitative                               | ART coverage                     | Coverage  |
| Castro R et al       | 2016 | Brazil                | Americas              | Upper middle | Quantitative                               | ART coverage                     | Coverage  |
| Burrage A et al      | 2018 | Sub-Saharan Africa    | Africa                | Across       | Quantitative                               | ART coverage                     | Coverage  |
| Beer L et al         | 2016 | USA                   | Americas              | High         | Quantitative                               | Race, ethnicity, gender          | Inequity  |
| Barnabas RV et al    | 2016 | South Africa & Uganda | Africa                | Across       | Quantitative                               | ART coverage                     | Coverage  |
| Barlow-Mosha L et al | 2017 | Across countries      | Across countries      | Across       | Review                                     | Risks & benefit of Universal ART | Coverage  |
| Aung NHHL et al      | 2020 | Myanmar               | South-East Asia       | LM           | Mixed                                      | ART coverage                     | Coverage  |
| Astawesegn FH et al  | 2022 | Sub-Saharan Africa    | Africa                | Across       | Quantitative                               | ART coverage                     | Coverage  |
| Assefa Y et al       | 2019 | Ethiopia              | Africa                | low          | Mixed (review & quantitative, qualitative) | ART coverage                     | Coverage  |
| Assefa Y et al       | 2017 | Ethiopia              | Africa                | low          | Mixed (review & quantitative, qualitative) | ART coverage                     | Coverage  |
| Goga AE et al        | 2017 | Across countries      | Across countries      | Across       | Review                                     | ART coverage                     | Coverage  |
| Gebre Y et al        | 2016 | Caribbean             | Across countries      | Across       | Review                                     | ART coverage                     | Coverage  |
| García-Deltoro M     | 2019 | USA                   | Americas              | High         | Review                                     | ART coverage                     | Coverage  |
| Furuoka F et al      | 2015 | Sub-Saharan Africa    | Africa                | Across       | Quantitative                               | Determinants                     | Coverage  |
| Floyed S et al       | 2020 | Zambia & South Africa | Africa                | Across       | Quantitative                               | ART coverage                     | Coverage  |
| Estill J et al       | 2018 | Sub-Saharan Africa    | Africa                | Across       | Quantitative                               | ART coverage                     | Coverage  |
| Elgalib A et al      | 2020 | Oman                  | Eastern Mediterranean | High         | Quantitative                               | ART coverage                     | Coverage  |
| Dutta A et al        | 2015 | Across countries      | Across countries      | Across       | Quantitative                               | Cost to scale-up ART             | Financial |

|                    |      |                    |                       |              |              |                                      |            |
|--------------------|------|--------------------|-----------------------|--------------|--------------|--------------------------------------|------------|
|                    |      |                    |                       |              |              |                                      | protection |
| Demeke HB et al    | 2020 | USA                | Americas              | High         | Quantitative | disparity ethnic                     | Inequity   |
| Dahourou DL        | 2017 | Sub-Saharan Africa | Africa                | across       | Review       | challenges & compliance ART coverage | Coverage   |
| King EJ et al      | 2021 | Kazakhstan         | European              | Upper middle | Quantitative | ART coverage                         | Coverage   |
| Kim AA et al       | 2016 | Kenya              | Africa                | LM           | Quantitative | ART coverage                         | Coverage   |
| Indravudh PP et al | 2021 | Malawi             | Africa                | LM           | Quantitative | ART coverage                         | Coverage   |
| Hueriga H et al    | 2018 | South Africa       | Africa                | Upper middle | Quantitative | ART coverage                         | Coverage   |
| Hoots BE et al     | 2017 | USA                | Americas              | High         | Quantitative | ART coverage                         | Coverage   |
| Holland CE et al   | 2015 | Cameroon           | Africa                | LM           | Quantitative | ART coverage                         | Coverage   |
| Hayes R et al      | 2017 | Zambia             | Africa                | LM           | Quantitative | ART coverage                         | Coverage   |
| Harooni MZ et al   | 2021 | Afghanistan        | Eastern Mediterranean | low          | Quantitative | ART coverage                         | Coverage   |
| Haacker M          | 2018 | Kenya              | Africa                | LM           | Quantitative | Barriers to access                   | Coverage   |
| Lou J et al        | 2017 | China              | Western Pacific       | Upper middle | Quantitative | ART coverage                         | Coverage   |
| Lolekha R et al    | 2020 | Thailand           | South-East Asia       | Upper middle | Quantitative | ART coverage                         | Coverage   |
| Levi J et al       | 2016 | Across countries   | Across countries      | Across       | Review       | ART coverage                         | Coverage   |



|                      |      |                    |                  |              |              |              |          |
|----------------------|------|--------------------|------------------|--------------|--------------|--------------|----------|
| Lebelonyane R et al  | 2021 | Botswana           | Africa           | Upper middle | Quantitative | ART coverage | Coverage |
| Lazuardi E et al     | 2020 | Indonesia          | South-East Asia  | LM           | Qualitative  | ART coverage | Coverage |
| Larmarange J et al   | 2018 | South Africa       | Africa           | Upper middle | Quantitative | ART coverage | Coverage |
| Lancaster KE et al   | 2016 | Malawi             | Africa           | low          | Quantitative | ART coverage | Coverage |
| De La Mata NL et al  | 2015 | Australia          | Western Pacific  | High         | Quantitative | ART coverage | Coverage |
| Pathmanathan I et al | 2020 | Mozambique         | Africa           | low          | Quantitative | ART coverage | Coverage |
| Oklakunde BO et al   | 2019 | Sub-Saharan Africa | Africa           | Across       | Quantitative | ART coverage | Coverage |
| New TW et al         | 2021 | Myanmar            | South-East Asia  | LM           | Quantitative | ART coverage | Coverage |
| Miyazaki N et al     | 2017 | Japan              | Western Pacific  | High         | Quantitative | ART coverage | Coverage |
| Mendez-Lopez A et al | 2019 | Across countries   | Across countries | Across       | Quantitative | ART coverage | Coverage |
| Mboup A et al        | 2018 | Benin              | Africa           | LM           | Quantitative | ART coverage | Coverage |
| Marukutira T et al   | 2020 | Australia          | Western Pacific  | High         | Quantitative | ART Coverage | Coverage |
| Marinda E et al 2020 | 2020 | South Africa       | Africa           | Upper middle | Quantitative | ART coverage | Coverage |
| Maman D et al        | 2016 | Malawi             | Africa           | low          | Quantitative | ART coverage | Coverage |
| Makhema J et al      | 2019 | Botswana           | Africa           | Upper middle | Quantitative | ART coverage | Coverage |
| Tao L et al          | 2017 | China              | Western Pacific  | Upper middle | Quantitative | ART Coverage | Coverage |
| Takarinda KC et al   | 2016 | Zimbabwe           | Africa           | LM           | Quantitative | ART Coverage | Coverage |
| Soumah A et al       | 2019 | France             | European         | High         | Quantitative | ART Coverage | Coverage |
| Solomon SS et al     | 2016 | India              | South-East Asia  | LM           | Quantitative | ART Coverage | Coverage |

|                      |      |                                 |                  |              |              |                                |                      |
|----------------------|------|---------------------------------|------------------|--------------|--------------|--------------------------------|----------------------|
| Shen M et al         | 2018 | USA                             | Americas         | High         | Quantitative | cost effectiveness             | Financial protection |
| Shanaube K et al     | 2020 | Zambia & South Africa           | Africa           | Across       | Quantitative | ART Coverage                   | Coverage             |
| Scott N et al        | 2017 | Australia                       | Western Pacific  | High         | Quantitative | ART Coverage                   | Coverage             |
| Sazonova Y et al     | 2020 | Ukraine                         | European         | LM           | Quantitative | ART Coverage                   | Coverage             |
| Saito S et al        | 2018 | Across countries                | Africa           | Across       | Quantitative | ART Coverage                   | Coverage             |
| Sabapathy K et al    | 2017 | Zambia & South Africa           | Africa           | Across       | Quantitative | ART Coverage                   | Coverage             |
| Zelaya CE et al 2016 | 2016 | Vietnam                         | South-East Asia  | LM           | Quantitative | RCT-ART Coverage               | Coverage             |
| Yoong D et al        | 2018 | Canada                          | Americas         | High         | Quantitative | OOP expenditure                | Financial protection |
| Yang X et al         | 2020 | China                           | Western Pacific  | Upper middle | Quantitative | ART Coverage                   | Coverage             |
| Yan I et al          | 2016 | 41 high HIV-TB burden countries | Across countries | Across       | Quantitative | ART Coverage                   | Coverage             |
| Wirth KE et al       | 2020 | Botswana                        | Africa           | Upper middle | Quantitative | ART Coverage                   | Coverage             |
| Williams D et al     | 2021 | Eswatini                        | Africa           | LM           | Quantitative | ART Coverage                   | Coverage             |
| Vu LTH et al         | 2020 | Vietnam                         | Western Pacific  | LM           | Quantitative | OOP expenditure                | Financial protection |
| Zhuang X et al       | 2018 | China                           | Western Pacific  | Upper middle | Quantitative | ART Coverage                   | Coverage             |
| Beck E et al         | 2021 | Croatia                         | European         | High         | Quantitative | cost of ART care               | Financial protection |
| Ross EL et al        | 2015 | USA                             | Americas         | High         | Quantitative | cost effectiveness of ART care | Financial protection |
| Siregar AYM et al    | 2015 | Indonesia                       | South-East Asia  | LM           | Quantitative | cost of treatment              | Financial protection |
| Belay YB et al       | 2021 | Ethiopia                        | Africa           | low          | Quantitative | cost-utility                   | Financial protection |

|                     |      |                                            |                 |              |              |                                |                      |
|---------------------|------|--------------------------------------------|-----------------|--------------|--------------|--------------------------------|----------------------|
| Naidoo K et al      | 2015 | South Africa                               | Africa          | Upper middle | Quantitative | cost-effectiveness             | Financial protection |
| Duffy M et al       | 2019 | Uganda, South Africa, Zimbabwe             | Africa          | Across       | Qualitative  | Enablers and Barriers          | Coverage             |
| Maddali MV et al    | 2015 | India                                      | South-East Asia | LM           | Quantitative | Cost effectiveness             | Financial protection |
| Culhane J et al     | 2020 | Kenya                                      | Africa          | LM           | Quantitative | cost effectiveness             | Financial protection |
| Ouattara EN et al   | 2019 | Côte d'Ivoire                              | Africa          | LM           | Quantitative | cost effectiveness             | Financial protection |
| Krentz H et al      | 2019 | Canada                                     | Americas        | High         | Quantitative | cost effectiveness             | Financial protection |
| Nichols BE et al    | 2021 | Zambia                                     | Africa          | LM           | Quantitative | costs                          | Financial protection |
| Wu H et al          | 2021 | China                                      | Western Pacific | Upper middle | Quantitative | cost                           | Financial protection |
| Gumede-Moyo S et al | 2019 | Zambia                                     | Africa          | LM           | Quantitative | ART Coverage                   | Coverage             |
| Johnson LF et al    | 2020 | South Africa                               | Africa          | Upper middle | Quantitative | ART Coverage                   | Coverage             |
| Desmonde S et al    | 2019 | South Africa, cote d'ivoire & Burkina Faso | Africa          | across       | Quantitative | cost effectiveness of ART care | Financial protection |
| Mikkelsen E et al   | 2017 | Ghana                                      | Africa          | LM           | Quantitative | cost of ART care               | Financial protection |
| Estrada V et al     | 2022 | Spain                                      | European        | High         | Quantitative | cost                           | Financial protection |
| Thin K et al        | 2019 | Cambodia                                   | South-East Asia | LM           | Quantitative | cost                           | Financial protection |
| Tucker A et al      | 2020 | Zambia                                     | Africa          | LM           | Quantitative | cost                           | Financial protection |

|                       |      |                    |                  |              |              |                                           |                      |
|-----------------------|------|--------------------|------------------|--------------|--------------|-------------------------------------------|----------------------|
| Ong KJ et al          | 2019 | British            | European         | High         | Quantitative | cost                                      | Financial protection |
| Dugdale CM et al      | 2019 | South Africa       | Africa           | Upper middle | Quantitative | cost effectiveness                        | Financial protection |
| Treskova M et al      | 2016 | Germany            | European         | High         | Quantitative | cost                                      | Financial protection |
| Zheng A et al         | 2018 | India              | South-East Asia  | LM           | Quantitative | cost                                      | Financial protection |
| Boerma R et al        | 2019 | Sub-Saharan Africa | Africa           | Across       | Quantitative | ART Coverage                              | Coverage             |
| Sharma A et al        | 2019 | India              | South-East Asia  | LM           | Quantitative | cost                                      | Financial protection |
| Chkartishvili N et al | 2016 | Georgia            | European         | Upper middle | Quantitative | ART Coverage                              | Coverage             |
| Safarnejad A          | 2017 | Across countries   | Across countries | Across       | Review       | Enablers and Barriers                     | Coverage             |
| Thuppal SV et al      | 2015 | India              | South-East Asia  | LM           | Quantitative | cost                                      | Financial protection |
| Wu C et al            | 2021 | China              | Western Pacific  | Upper middle | Quantitative | ART Coverage                              | Coverage             |
| Agarwal R et al       | 2017 | India              | South-East Asia  | LM           | Quantitative | cost                                      | Financial protection |
| Uthman R et al        | 2018 | Sub-Saharan Africa | Africa           | across       | Quantitative | cost                                      | Financial protection |
| Hu Q et al            | 2019 | China              | Western Pacific  | Upper middle | Quantitative | cost                                      | Financial protection |
| Mbachu C et al        | 2016 | Nigeria            | Africa           | LM           | Qualitative  | Political economy of ART decentralization | Coverage             |
| Kumar GA et al        | 2018 | India              | South-East Asia  | LM           | Quantitative | cost                                      | Financial protection |

|                     |      |              |                 |              |              |                           |                      |
|---------------------|------|--------------|-----------------|--------------|--------------|---------------------------|----------------------|
| Odayar J et al      | 2019 | South Africa | Africa          | Upper middle | Quantitative | ART coverage              | Coverage             |
| Johns B et al       | 2017 | Vietnam      | Western Pacific | LM           | Quantitative | OOP                       | Financial protection |
| Larson BA et al     | 2018 | Kenya        | Africa          | LM           | Quantitative | cost                      | Financial protection |
| Papot E et al       | 2017 | France       | European        | High         | Quantitative | cost                      | Financial protection |
| Joseph B et al      | 2016 | Canada       | Americas        | High         | Quantitative | ART coverage              | Coverage             |
| Ciaranello AL et al | 2015 | Africa       | Africa          | Across       | Quantitative | Cost effectiveness        | Financial protection |
| Cornelius LJ et al  | 2018 | Nigeria      | Africa          | LM           | Qualitative  | Barriers to access        | Coverage             |
| Oddershede L et al  | 2016 | British      | European        | High         | Quantitative | Cost effectiveness        | Financial protection |
| Jamieson L et al    | 2021 | South Africa | Africa          | Upper middle | Quantitative | cost & cost-effectiveness | Financial protection |
| Tweya H et al       | 2016 | Malawi       | Africa          | low          | Quantitative | cost effectiveness        | Financial protection |
| Bhatasara S         | 2015 | Zimbabwe     | Africa          | low          | Quantitative | ART coverage              | Coverage             |
| Jain V et al        | 2015 | Uganda       | Africa          | low          | Quantitative | Costs                     | Financial protection |
| Enns B et al        | 2019 | USA          | Americas        | High         | Quantitative | costs ART on vs ART off   | Financial protection |
| Ritchwood TD et al  | 2017 | USA          | Americas        | High         | Quantitative | Expenditure               | Financial protection |
| Punekar YS et al    | 2019 | China        | Western Pacific | Upper middle | Quantitative | ART coverage              | Coverage             |
| Beer L et al        | 2016 | USA          | Americas        | High         | Quantitative | Race, gender, Ethnicity   | Inequity             |

|                       |      |                                 |                       |              |              |                     |                      |
|-----------------------|------|---------------------------------|-----------------------|--------------|--------------|---------------------|----------------------|
| Maggiolo F et al      | 2015 | Italy                           | European              | High         | Quantitative | cost                | Financial protection |
| Amzel A et al         | 2018 | South Africa                    | Africa                | Upper middle | Quantitative | ART coverage        | Coverage             |
| Boyer S et al         | 2020 | Burkina Faso, Cameroon, Senegal | Africa                | Across       | Quantitative | cost effectiveness  | Financial protection |
| Church K et al        | 2017 | Sub-Saharan Africa              | Africa                | across       | Quantitative | Factors             | Coverage             |
| Restelli U et al      | 2017 | Italy                           | European              | High         | Quantitative | Cost effectiveness  | Financial protection |
| Parker B et al        | 2021 | Canada                          | Americas              | High         | Quantitative | cost effectiveness  | Financial protection |
| Taramasso L et al     | 2018 | Italy                           | European              | High         | Quantitative | cost                | Financial protection |
| Shrestha RK et al     | 2020 | USA                             | Americas              | High         | Quantitative | Cost                | Financial protection |
| McCann NC et al       | 2020 | USA                             | Americas              | High         | Quantitative | cost                | Financial protection |
| Kimaro GD et al       | 2017 | Tanzania                        | Africa                | LM           | Quantitative | cost                | Financial protection |
| Adjeter V et al       | 2019 | Ghana                           | Africa                | LM           | Qualitative  | access              | Coverage             |
| Barry M et al         | 2022 | Saudi Arabia                    | Eastern Mediterranean | High         | Quantitative | cost                | Financial protection |
| Tierrablanca LE et al | 2018 | 11 countries                    | Across countries      | Across       | Quantitative | cost effectiveness  | Financial protection |
| Garay OU et al        | 2019 | France                          | European              | High         | Quantitative | Cost effectiveness  | Financial protection |
| Alhassan RK et al     | 2021 | Ghana                           | Africa                | LM           | Quantitative | Quality of ART care | Quality              |
| Yeshiwas Y et al      | 2021 | Ethiopia                        | Africa                | low          | Quantitative | Quality of ART care | Quality              |

|                    |      |                    |                  |              |              |                         |                      |
|--------------------|------|--------------------|------------------|--------------|--------------|-------------------------|----------------------|
| Julien A et al     | 2021 | South Africa       | Africa           | Upper middle | Qualitative  | Quality of ART care     | Quality              |
| Steinert JI et al  | 2021 | Eswatini           | Africa           | LM           | Quantitative | CHE                     | Financial protection |
| Zhang L et al      | 2015 | Thailand           | South-East Asia  | Upper middle | Quantitative | ART coverage            | Coverage             |
| Granich R et al    | 2015 | 30 countries       | Across countries | Across       | Quantitative | ART coverage            | Coverage             |
| Long LC et al      | 2017 | South Africa       | Africa           | Upper middle | Quantitative | Cost effectiveness      | Financial protection |
| Kalichman SC et al | 2017 | USA                | Americas         | High         | Quantitative | ART coverage            | Coverage             |
| Landovitz RJ et al | 2017 | USA                | Americas         | High         | Quantitative | Race                    | Inequity             |
| Llibre JM et al    | 2018 | Spain & France     | European         | High         | Quantitative | Cost effectiveness      | Financial protection |
| Grimes RM et al    | 2018 | USA                | Americas         | High         | Quantitative | cost                    | Financial protection |
| Laut K et al       | 2018 | European countries | European         | Across       | Quantitative | Disparity b/n countries | Inequity             |
| Mao JB et al       | 2019 | USA                | Americas         | High         | Quantitative | Cost                    | Financial protection |
| Valbert F et al    | 2020 | Germany            | European         | High         | Quantitative | Cost                    | Financial protection |
| Marukutira T et al | 2019 | Botswana           | Africa           | Upper middle | Quantitative | citizen vs non-citizen  | Inequity             |

CHE: Catastrophic Health Expenditure; LM; lower-middle; OOP: Out-of-pocket
